# Supplementary material for: Genetic sequence characterization and naturally acquired immune response to Plasmodium vivax Rhoptry Neck Protein 2 (PvRON2)
Source: PubMed Central journal article supplement (PMC6208078; doi:10.1186/s12936-018-2543-7), 2018-10-31
Supplement: 12936_2018_2543_MOESM1_ESM.pdf [file 12936_2018_2543_MOESM1_ESM.pdf]

**Additional file 1. Primer sequences used for the amplification of *pvrn2* (5482-6240 nt).**

| <b>Fragment</b> | <b>Position (nt)*</b> | <b>Oligonucleotide</b> | <b>Sequence (5-3')</b> |
|-----------------|-----------------------|------------------------|------------------------|
| 1               | 5.261-5.855           | <i>pvrn2</i> -F1       | CAGAACGGTCAAGCCAAC     |
|                 |                       | <i>pvrn2</i> -R1       | CGATTTGGGTAGCAGCACAT   |
| 2               | 5.482-6.240           | <i>pvrn2</i> -F2       | GCCTTCATCGAAATTGTAGACC |
|                 |                       | <i>pvrn2</i> -R2       | CATGCAAGCTTGTGTGGAG    |
| 3               | 5.868-6.408           | <i>pvrn2</i> -F3       | GAAGGCCATGAAAAATGGAG   |
|                 |                       | <i>pvrn2</i> -R3       | GGACAAAAATTTCTCCACATG  |
