# Supplementary material for: Genetic sequence characterization and naturally acquired immune response to Plasmodium vivax Rhoptry Neck Protein 2 (PvRON2)
Source: PubMed Central journal article supplement (PMC6208078; doi:10.1186/s12936-018-2543-7), 2018-10-31
Supplement: 12936_2018_2543_MOESM2_ESM.pdf [file 12936_2018_2543_MOESM2_ESM.pdf]

**Additional file 2. Country, number of sequences, accession numbers and database used in polymorphisms analyses.**

| Country  | n° of sequences | Access number                                                                                                                                                                                                                                                                                                                                                                                           | Data bank |
|----------|-----------------|---------------------------------------------------------------------------------------------------------------------------------------------------------------------------------------------------------------------------------------------------------------------------------------------------------------------------------------------------------------------------------------------------------|-----------|
| Brazil   | 36              | MF818108; MF818109; MF818110;<br>MF818111; MF818112; MF818113;<br>MF818114; MF818115; MF818116;<br>MF818117; MF818118; MF818119;<br>MF818120; MF818121; MF818122;<br>MF818123; MF818124; MF818125;<br>MF818126; MF818127; MF818128;<br>MF818129; MF818130; MF818131;<br>MF818132; MF818133; MF818134;<br>MF818135; MF818136; MF818137;<br>MF818138; MF818139; MF818140;<br>MF818141; MF818142; MF818143 | GenBank   |
| Brazil   | 3               | Brazill; Brazil32; Belem                                                                                                                                                                                                                                                                                                                                                                                | PlasmoDB  |
| Thailand | 13              | Thailand_VKBT-100; Thailand_VKBT-101; Thailand_VKBT-71;<br>Thailand_VKBT-72; Thailand_VKBT-94;<br>Thailand_VKBT-95; Thailand_VKBT-98;<br>Thailand_VKBT-99; Thailand_VKTS-36;<br>Thailand_VKTS-37; Thailand_VKTS-39;<br>Thailand_VKTS-45; Thailand_VKTS-52.                                                                                                                                              | PlasmoDB  |
| Peru     | 19              | Peru00692; Peru00699; Peru06;<br>Peru07; Peru08; Peru1008; Peru2025;<br>Peru257; Peru259; Peru260; Peru262;<br>Peru3133; Peru3136; Peru3232;<br>Peru4023; Peru852; Peru858; Peru872;<br>Peru99622.                                                                                                                                                                                                      | PlasmoDB  |
| China    | 20              | BAM13385.1; BAM13384.1;<br>BAM13383.1; BAM13382.1;<br>BAM13381.1; BAM13380.1;<br>BAM13379.1; BAM13378.1;<br>BAM13377.1; BAM13376.1;<br>BAM13375.1; BAM13374.1;<br>BAM13373.1; BAM13372.1;<br>BAM13371.1; BAM13370.1;<br>BAM13369.1; BAM13368.1;<br>BAM13367.1; BAM13366.1.                                                                                                                              | GenBank   |
| China    | 6               | China_NB-17; China_LZCH-13;<br>China_NB-13-1; China_NB-15;<br>China_NB-16; China_LZCH-20                                                                                                                                                                                                                                                                                                                | PlasmoDB  |
| Colombia | 23              | Columbia_30102100438-A;<br>Columbia_30101099040;<br>Columbia_30101099036;<br>Columbia_30102100437;<br>Columbia_30102100438-B;<br>Columbia_30102100439;<br>Columbia_30102100446;<br>Columbia_30102100440;<br>Columbia_30102100441-B;<br>Columbia_30102100445;                                                                                                                                            | PlasmoDB  |

|             |    |                                                                                                                                                                                                                                                                                                         |          |
|-------------|----|---------------------------------------------------------------------------------------------------------------------------------------------------------------------------------------------------------------------------------------------------------------------------------------------------------|----------|
|             |    | Columbia_30102100448;<br>Columbia_30102100485;<br>Columbia_30102100486;<br>Columbia_30102100488;<br>Columbia_30111110020;<br>Columbia_30111110026;<br>Columbia_30111110015;<br>Columbia_30103103280;<br>Columbia_30102100504;<br>Columbia_30102100489;<br>Columbia_30102100490;<br>Columbia_30102100491 |          |
| India       | 2  | IndiaNYC; IndiaVII                                                                                                                                                                                                                                                                                      | PlasmoDB |
| Mauritania  | 1  | Mauritanial                                                                                                                                                                                                                                                                                             | PlasmoDB |
| North Korea | 1  | NorthKorean                                                                                                                                                                                                                                                                                             | PlasmoDB |
| Mexico      | 15 | Mexico_118-A; Mexico_161-04;<br>Mexico_165-A; Mexico_203-04;<br>Mexico_21-A; Mexico_267-A;<br>Mexico_32-E-03; Mexico_330-A;<br>Mexico_55-03; Mexico_566-A;<br>Mexico_63-08; Mexico_760-A;<br>Mexico_938-A; Mexico_980-A.;<br>Mexico_1086-A                                                              | PlasmoDB |
